# Supplementary material
Source: Springer Nature journal article supplement (https://www.springermedizin.de/resource/supplementary/12885_2010_2399_MOESM4_ESM.pdf/9461200)

**A**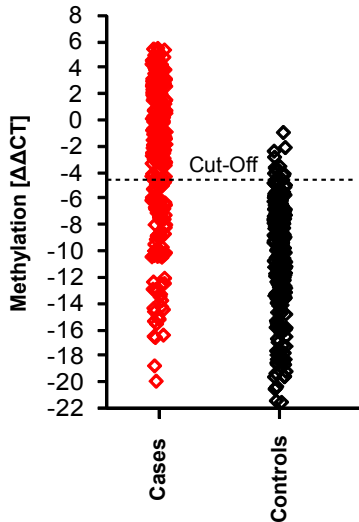**B**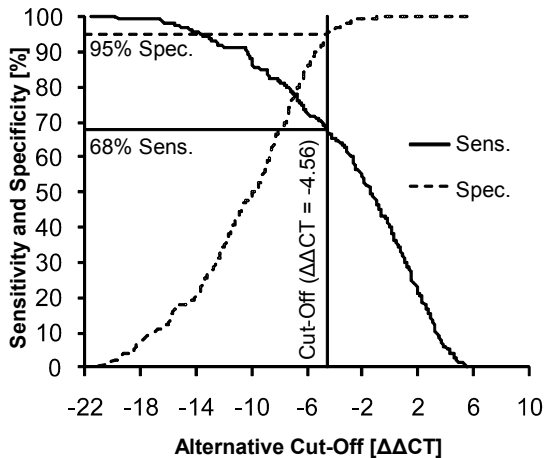**C**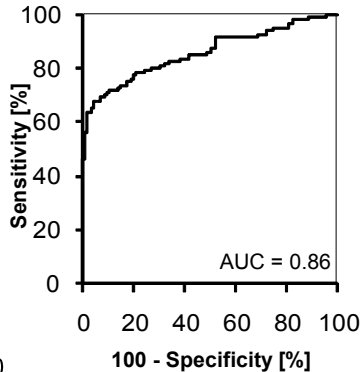

Supplement: MOESM4 [file 9461200]
